# Supplementary material
Source: PubMed Central journal article supplement (PMC4162183)
Supplement: supp_M114.558379_jbc.M114.558379-1.pdf [file supp_M114.558379_jbc.M114.558379-1.pdf]

**Supplemental Table 1: Deactivation kinetic parameters. Mean  $\pm$  SEM, from n experiments, for deactivation kinetics of WT and mutant Kv11.1 channels. The decay of current at -120 mV was fitted with a double exponential function to obtain fast ( $\tau_{fast,-120mV}$ ) and slow ( $\tau_{slow,-120mV}$ ) time constants for deactivation. The relative amplitudes of the fast and slow components are also shown ( $A_f/(A_f+A_s)$ ). Note that deactivation is dominated by the fast component at -120mV. Natural log of the fast time constant ( $\ln.\tau_{fast,-120mV}$ ) for each mutant was compared to that of WT channels to provide  $\Delta\ln.\tau_{fast,-120mV}$ .**

| Mutant                  | $\tau_{fast,-120mV}$ (ms) | $\ln.\tau_{fast,-120mV}$ | $\Delta\ln.\tau_{fast,-120mV}$ | $\tau_{slow,-120mV}$ (ms) | $A_f / (A_f + A_s)_{-120mV}$ | n  |
|-------------------------|---------------------------|--------------------------|--------------------------------|---------------------------|------------------------------|----|
| WT Kv11.1               | 33.6 $\pm$ 0.7            | 3.51 $\pm$ 0.02          |                                | 199.0 $\pm$ 7.1           | 0.83 $\pm$ 0.00              | 16 |
| $\Delta$ 2-137          | 8.6 $\pm$ 0.2             | 2.15 $\pm$ 0.03          | 1.36 $\pm$ 0.03                | 111.7 $\pm$ 10.1          | 0.87 $\pm$ 0.00              | 5  |
| N-Cap+PAS Kv10.1-Kv11.1 | 11.3 $\pm$ 0.3            | 2.42 $\pm$ 0.03          | 1.09 $\pm$ 0.03                | 125.3 $\pm$ 15.3          | 0.90 $\pm$ 0.00              | 5  |
| PAS Kv10.1-Kv11.1       | 16.2 $\pm$ 0.4            | 2.78 $\pm$ 0.02          | 0.73 $\pm$ 0.02                | 126.9 $\pm$ 10.2          | 0.93 $\pm$ 0.01              | 5  |
| R4D                     | 13.5 $\pm$ 0.2            | 2.60 $\pm$ 0.01          | 0.91 $\pm$ 0.01                | 154.9 $\pm$ 6.9           | 0.88 $\pm$ 0.01              | 13 |
| R4E                     | 14.4 $\pm$ 0.4            | 2.66 $\pm$ 0.02          | 0.85 $\pm$ 0.02                | 167.4 $\pm$ 9.11          | 0.89 $\pm$ 0.01              | 11 |
| R4K                     | 26.0 $\pm$ 0.4            | 3.26 $\pm$ 0.02          | 0.25 $\pm$ 0.02                | 202.6 $\pm$ 12.7          | 0.91 $\pm$ 0.01              | 13 |
| R5D                     | 13.4 $\pm$ 0.5            | 2.58 $\pm$ 0.04          | 0.93 $\pm$ 0.04                | 160.8 $\pm$ 10.6          | 0.87 $\pm$ 0.01              | 14 |
| R5E                     | 13.9 $\pm$ 0.7            | 2.61 $\pm$ 0.06          | 0.90 $\pm$ 0.06                | 155.9 $\pm$ 12.0          | 0.88 $\pm$ 0.01              | 11 |
| R5K                     | 22.8 $\pm$ 0.3            | 3.13 $\pm$ 0.01          | 0.38 $\pm$ 0.01                | 180.7 $\pm$ 8.5           | 0.85 $\pm$ 0.01              | 12 |
| R20D                    | 7.7 $\pm$ 0.2             | 2.03 $\pm$ 0.03          | 1.48 $\pm$ 0.03                | 110.7 $\pm$ 8.5           | 0.89 $\pm$ 0.02              | 11 |
| R20E                    | 17.5 $\pm$ 0.6            | 2.85 $\pm$ 0.04          | 0.66 $\pm$ 0.04                | 140.9 $\pm$ 20.3          | 0.88 $\pm$ 0.01              | 12 |
| R20K                    | 29.9 $\pm$ 0.9            | 3.39 $\pm$ 0.03          | 0.12 $\pm$ 0.03                | 206.5 $\pm$ 10.5          | 0.86 $\pm$ 0.01              | 15 |
| R56D                    | 9.7 $\pm$ 0.3             | 2.27 $\pm$ 0.03          | 1.24 $\pm$ 0.03                | 121.8 $\pm$ 23.0          | 0.91 $\pm$ 0.02              | 5  |
| R56E                    | 8.6 $\pm$ 0.2             | 2.14 $\pm$ 0.02          | 1.37 $\pm$ 0.02                | 116.7 $\pm$ 9.1           | 0.91 $\pm$ 0.01              | 14 |
| R56K                    | 42.6 $\pm$ 1.8            | 3.75 $\pm$ 0.04          | -0.24 $\pm$ 0.04               | 275.8 $\pm$ 9.5           | 0.84 $\pm$ 0.01              | 8  |
| D712R                   | 30.1 $\pm$ 0.8            | 3.40 $\pm$ 0.02          | 0.11 $\pm$ 0.02                | 150.5 $\pm$ 7.1           | 0.88 $\pm$ 0.0               | 6  |
| E722R                   | 29.1 $\pm$ 1.0            | 3.37 $\pm$ 0.03          | 0.14 $\pm$ 0.03                | 162.4 $\pm$ 7.5           | 0.88 $\pm$ 0.01              | 4  |
| D727R                   | 41.3 $\pm$ 0.9            | 3.72 $\pm$ 0.02          | -0.21 $\pm$ 0.02               | 170.7 $\pm$ 3.7           | 0.70 $\pm$ 0.00              | 15 |
| D767R                   | 28.8 $\pm$ 0.5            | 3.36 $\pm$ 0.02          | 0.15 $\pm$ 0.02                | 147.9 $\pm$ 8.2           | 0.88 $\pm$ 0.01              | 5  |
| D774R                   | 15.0 $\pm$ 0.7            | 2.71 $\pm$ 0.05          | 0.80 $\pm$ 0.05                | 228.5 $\pm$ 21.2          | 0.88 $\pm$ 0.03              | 6  |
| E788R                   | 14.8 $\pm$ 0.3            | 2.69 $\pm$ 0.02          | 0.82 $\pm$ 0.02                | 135.4 $\pm$ 9.2           | 0.87 $\pm$ 0.01              | 21 |
| D793R                   | 29.4 $\pm$ 0.8            | 3.38 $\pm$ 0.03          | 0.13 $\pm$ 0.03                | 219.2 $\pm$ 12.8          | 0.86 $\pm$ 0.01              | 15 |
| D803R                   | 17.3 $\pm$ 0.6            | 2.85 $\pm$ 0.04          | 0.66 $\pm$ 0.04                | 189.6 $\pm$ 12.3          | 0.94 $\pm$ 0.00              | 8  |
| E807R                   | NE                        |                          |                                |                           |                              |    |
| D821R                   | 27.7 $\pm$ 0.6            | 3.32 $\pm$ 0.02          | 0.19 $\pm$ 0.02                | 226.8 $\pm$ 10.2          | 0.87 $\pm$ 0.01              | 21 |
| D829R                   | 45.8 $\pm$ 0.6            | 3.82 $\pm$ 0.01          | -0.31 $\pm$ 0.01               | 275.3 $\pm$ 12.1          | 0.87 $\pm$ 0.01              | 13 |
| D836R                   | 31.1 $\pm$ 0.6            | 3.44 $\pm$ 0.02          | 0.07 $\pm$ 0.02                | 168.1 $\pm$ 1.8           | 0.88 $\pm$ 0.01              | 4  |
| D837R                   | 28.4 $\pm$ 0.5            | 3.35 $\pm$ 0.02          | 0.16 $\pm$ 0.02                | 172.8 $\pm$ 7.4           | 0.85 $\pm$ 0.02              | 5  |
| E840R                   | 30.3 $\pm$ 0.8            | 3.41 $\pm$ 0.03          | 0.10 $\pm$ 0.03                | 170.3 $\pm$ 5.5           | 0.88 $\pm$ 0.01              | 5  |
| D843R                   | 32.6 $\pm$ 0.7            | 3.48 $\pm$ 0.02          | 0.03 $\pm$ 0.02                | 194.2 $\pm$ 6.5           | 0.85 $\pm$ 0.01              | 11 |
| E847R                   | 28.2 $\pm$ 0.6            | 3.34 $\pm$ 0.02          | 0.17 $\pm$ 0.02                | 199.3 $\pm$ 7.7           | 0.83 $\pm$ 0.02              | 12 |
| D850R                   | 33.3 $\pm$ 0.8            | 3.50 $\pm$ 0.02          | 0.01 $\pm$ 0.02                | 218.6 $\pm$ 10.2          | 0.84 $\pm$ 0.01              | 16 |
| E857R                   | 25.8 $\pm$ 0.8            | 3.25 $\pm$ 0.03          | 0.26 $\pm$ 0.03                | 163.4 $\pm$ 9.4           | 0.88 $\pm$ 0.01              | 13 |
| R4D + D803R             | 8.6 $\pm$ 0.3             | 2.15 $\pm$ 0.03          | 1.36 $\pm$ 0.03                | 123.8 $\pm$ 14.6          | 0.93 $\pm$ 0.01              | 10 |
| R5D + D803R             | 8.1 $\pm$ 0.2             | 2.09 $\pm$ 0.02          | 1.42 $\pm$ 0.02                | 146.1 $\pm$ 9.8           | 0.92 $\pm$ 0.01              | 10 |
| R20D + D803R            | 11.0 $\pm$ 0.3            | 2.40 $\pm$ 0.03          | 1.11 $\pm$ 0.03                | 139.3 $\pm$ 23.6          | 0.89 $\pm$ 0.01              | 7  |
| R56D + D803R            | 29.3 $\pm$ 0.7            | 3.37 $\pm$ 0.02          | 0.14 $\pm$ 0.02                | 229.3 $\pm$ 16.7          | 0.90 $\pm$ 0.00              | 16 |
| R4E + E788R             | 11.9 $\pm$ 0.4            | 2.47 $\pm$ 0.03          | 1.04 $\pm$ 0.03                | 127.6 $\pm$ 12.4          | 0.87 $\pm$ 0.01              | 12 |
| R5E + E788R             | 11.6 $\pm$ 0.3            | 2.44 $\pm$ 0.03          | 1.07 $\pm$ 0.03                | 116.8 $\pm$ 9.2           | 0.93 $\pm$ 0.00              | 16 |
| R20E + E788R            | 10.0 $\pm$ 0.4            | 2.29 $\pm$ 0.04          | 1.22 $\pm$ 0.04                | 139.0 $\pm$ 14.4          | 0.93 $\pm$ 0.01              | 12 |
| R56E + E788R            | 12.6 $\pm$ 0.5            | 2.52 $\pm$ 0.04          | 0.99 $\pm$ 0.04                | 130.0 $\pm$ 7.4           | 0.91 $\pm$ 0.01              | 17 |
| N12E                    | 13.0 $\pm$ 0.2            | 2.57 $\pm$ 0.02          | 0.94 $\pm$ 0.02                | 128.0 $\pm$ 9.7           | 0.92 $\pm$ 0.00              | 5  |
| N12E + E788R            | 20.0 $\pm$ 0.7            | 2.99 $\pm$ 0.03          | 0.52 $\pm$ 0.03                | 121.6 $\pm$ 5.8           | 0.90 $\pm$ 0.01              | 8  |

|                           |             |             |             |              |             |    |
|---------------------------|-------------|-------------|-------------|--------------|-------------|----|
| R4E + R5E                 | 10.3 ± 0.2  | 2.33 ± 0.02 | 1.18 ± 0.02 | 92.0 ± 7.4   | 0.87 ± 0.00 | 5  |
| E698R + E699R             | 21.4 ± 0.3  | 3.06 ± 0.01 | 0.45 ± 0.01 | 175.6 ± 8.5  | 0.88 ± 0.01 | 5  |
| R4E + R5E + E698R + E699R | 20.2 ± 0.8  | 3.00 ± 0.04 | 0.51 ± 0.04 | 156.8 ± 25.8 | 0.85 ± 0.02 | 5  |
| R4D + R5D                 | 10.6 ± 0.2  | 2.36 ± 0.02 | 1.15 ± 0.02 | 97.4 ± 7.7   | 0.87 ± 0.01 | 5  |
| R4D + R5D + R56D          | 9.5 ± 0.3   | 2.25 ± 0.03 | 1.26 ± 0.03 | 145.3 ± 12.7 | 0.88 ± 0.01 | 6  |
| R56A                      | 20.0 ± 1.0  | 2.99 ± 0.05 | 0.52 ± 0.05 | 247.0 ± 19.2 | 0.96 ± 0.00 | 5  |
| D803A                     | 25.8 ± 1.1  | 3.24 ± 0.04 | 0.27 ± 0.04 | 185.7 ± 22.0 | 0.93 ± 0.01 | 11 |
| R56A + D803A              | 28.5 ± 0.79 | 3.35 ± 0.03 | 0.16 ± 0.03 | 168.0 ± 9.9  | 0.91 ± 0.00 | 12 |
| N12A                      | 18.4 ± 1.0  | 2.91 ± 0.05 | 0.60 ± 0.05 | 190.6 ± 15.0 | 0.85 ± 0.01 | 4  |
| E788A                     | 17.7 ± 0.8  | 2.87 ± 0.04 | 0.64 ± 0.04 | 153.4 ± 11.7 | 0.92 ± 0.00 | 6  |
| N12A + E788A              | 16.2 ± 0.2  | 2.79 ± 0.01 | 0.72 ± 0.01 | 157.9 ± 7.9  | 0.92 ± 0.00 | 7  |
| R4A + R5A                 | 14.8 ± 0.3  | 2.69 ± 0.02 | 0.82 ± 0.02 | 228.6 ± 18.4 | 0.88 ± 0.02 | 5  |
| E698A + E699A             | 24.3 ± 0.7  | 3.19 ± 0.03 | 0.32 ± 0.03 | 245.1 ± 25.2 | 0.91 ± 0.00 | 6  |
| R4A + R5A + E698A + E699A | 18.2 ± 0.4  | 2.90 ± 0.02 | 0.61 ± 0.02 | 198.6 ± 10.4 | 0.85 ± 0.01 | 7  |

**Supplemental Table 2. Chemical potential energy parameters. Mean  $\pm$  SEM, from n experiments, obtained from Boltzmann fits of steady-state deactivation g-V curves (see Methods for details). The voltage required for half-maximal deactivation ( $V_{0.5}$ ), as well as the slope factors, are given for each mutant and WT Kv11.1 channels. Fitting with a thermodynamic form of the Boltzmann function provides a chemical potential energy at 0 mV ( $\Delta G_0$ ) for each mutant, which can then be compared to that of WT Kv11.1 channels to give  $\Delta\Delta G_0$ .**

| Mutant                  | $V_{0.5}$ (mV)   | Slope (mV)    | $\Delta G_0$ (kJ.mol <sup>-1</sup> ) | $\Delta\Delta G_0$ (kJ.mol <sup>-1</sup> ) | n  |
|-------------------------|------------------|---------------|--------------------------------------|--------------------------------------------|----|
| WT Kv11.1               | -61.2 $\pm$ 0.4  | 6.7 $\pm$ 0.2 | -23.7 $\pm$ 0.5                      |                                            | 5  |
| $\Delta$ 2-137          | -29.4 $\pm$ 0.3  | 6.1 $\pm$ 0.2 | -23.7 $\pm$ 0.5                      | 0.0 $\pm$ 0.5                              | 5  |
| N-Cap/PAS Kv10.1-Kv11.1 | -24.9 $\pm$ 1.1  | 8.2 $\pm$ 0.3 | -7.7 $\pm$ 0.7                       | 16.0 $\pm$ 0.7                             | 5  |
| PAS Kv10.1-Kv11.1       | -40.9 $\pm$ 0.7  | 5.9 $\pm$ 0.1 | -17.1 $\pm$ 0.3                      | 6.6 $\pm$ 0.3                              | 5  |
| R4D                     | -37.2 $\pm$ 1.0  | 5.3 $\pm$ 0.1 | -18.8 $\pm$ 1.0                      | 4.9 $\pm$ 1.0                              | 5  |
| R4E                     | -36.6 $\pm$ 0.2  | 5.8 $\pm$ 0.1 | -16.3 $\pm$ 0.5                      | 7.4 $\pm$ 0.5                              | 3  |
| R4K                     | -56.0 $\pm$ 0.7  | 6.5 $\pm$ 0.6 | -23.0 $\pm$ 1.7                      | 0.7 $\pm$ 1.7                              | 5  |
| R5D                     | -34.5 $\pm$ 0.76 | 6.0 $\pm$ 0.1 | -14.6 $\pm$ 0.5                      | 9.2 $\pm$ 0.5                              | 5  |
| R5E                     | -38.4 $\pm$ 0.5  | 4.9 $\pm$ 0.1 | -21.1 $\pm$ 0.7                      | 2.6 $\pm$ 0.7                              | 3  |
| R5K                     | -55.4 $\pm$ 0.3  | 6.1 $\pm$ 0.1 | -24.2 $\pm$ 0.4                      | -0.4 $\pm$ 0.4                             | 4  |
| R20D                    | -30.1 $\pm$ 1.0  | 6.7 $\pm$ 0.3 | -11.8 $\pm$ 0.9                      | 11.9 $\pm$ 0.9                             | 5  |
| R20E                    | -48.5 $\pm$ 0.4  | 5.5 $\pm$ 0.1 | -22.9 $\pm$ 0.5                      | 0.8 $\pm$ 0.5                              | 12 |
| R20K                    | -60.8 $\pm$ 1.0  | 6.4 $\pm$ 0.3 | -25.5 $\pm$ 0.7                      | -1.8 $\pm$ 0.7                             | 7  |
| R56D                    | -25.4 $\pm$ 1.2  | 6.0 $\pm$ 0.2 | -10.8 $\pm$ 0.9                      | 12.9 $\pm$ 0.9                             | 6  |
| R56E                    | -32.3 $\pm$ 1.2  | 6.1 $\pm$ 0.2 | -13.6 $\pm$ 1.0                      | 10.2 $\pm$ 1.0                             | 4  |
| R56K                    | -64.6 $\pm$ 0.8  | 7.5 $\pm$ 0.6 | -24.1 $\pm$ 1.7                      | -0.4 $\pm$ 1.7                             | 3  |
| D712R                   | -58.2 $\pm$ 0.6  | 6.8 $\pm$ 0.3 | -22.2 $\pm$ 0.8                      | 1.6 $\pm$ 0.8                              | 6  |
| E722R                   | -59.8 $\pm$ 0.1  | 6.4 $\pm$ 0.3 | -23.6 $\pm$ 1.1                      | 0.1 $\pm$ 1.1                              | 4  |
| D727R                   | -56.4 $\pm$ 0.8  | 6.7 $\pm$ 0.3 | -22.0 $\pm$ 1.4                      | 1.7 $\pm$ 1.4                              | 5  |
| D767R                   | -53.6 $\pm$ 0.8  | 6.9 $\pm$ 0.3 | -19.8 $\pm$ 0.9                      | 3.9 $\pm$ 0.9                              | 5  |
| D774R                   | -45.0 $\pm$ 0.4  | 5.9 $\pm$ 0.3 | -20.9 $\pm$ 1.3                      | 2.8 $\pm$ 1.3                              | 6  |
| E788R                   | -39.4 $\pm$ 0.3  | 6.2 $\pm$ 0.2 | -17.0 $\pm$ 0.7                      | 6.7 $\pm$ 0.7                              | 7  |
| D793R                   | -57.6 $\pm$ 0.3  | 6.1 $\pm$ 0.1 | -25.4 $\pm$ 0.8                      | -1.7 $\pm$ 0.8                             | 6  |
| D803R                   | -29.9 $\pm$ 0.7  | 6.2 $\pm$ 0.2 | -12.5 $\pm$ 0.7                      | 11.3 $\pm$ 0.7                             | 8  |
| E807R                   | NE               |               |                                      |                                            |    |
| D821R                   | -58.7 $\pm$ 0.9  | 7.5 $\pm$ 1.0 | -22.6 $\pm$ 2.7                      | 1.1 $\pm$ 2.7                              | 5  |
| D829R                   | -64.9 $\pm$ 0.5  | 7.3 $\pm$ 0.2 | -23.2 $\pm$ 0.7                      | 0.1 $\pm$ 2.7                              | 12 |
| D836R                   | -60.2 $\pm$ 0.8  | 6.9 $\pm$ 0.5 | -22.4 $\pm$ 1.6                      | 0.5 $\pm$ 0.7                              | 4  |
| D837R                   | -59.2 $\pm$ 1.6  | 6.4 $\pm$ 0.2 | -24.4 $\pm$ 1.6                      | -0.6 $\pm$ 1.6                             | 4  |
| E840R                   | -57.3 $\pm$ 0.7  | 6.8 $\pm$ 0.3 | -21.5 $\pm$ 1.2                      | 2.2 $\pm$ 1.2                              | 4  |
| D843R                   | -60.1 $\pm$ 0.8  | 6.2 $\pm$ 0.3 | -24.8 $\pm$ 1.6                      | -1.0 $\pm$ 1.6                             | 5  |
| E847R                   | -58.8 $\pm$ 0.3  | 5.5 $\pm$ 0.1 | -27.2 $\pm$ 0.4                      | -3.5 $\pm$ 0.4                             | 6  |
| D850R                   | -61.6 $\pm$ 0.3  | 5.9 $\pm$ 0.1 | -26.4 $\pm$ 0.7                      | -2.7 $\pm$ 0.7                             | 6  |
| E857R                   | -48.5 $\pm$ 1.0  | 6.6 $\pm$ 0.6 | -20.6 $\pm$ 1.8                      | 3.2 $\pm$ 1.8                              | 7  |
| R4D + D803R             | -17.3 $\pm$ 1.2  | 8.5 $\pm$ 0.5 | -5.2 $\pm$ 0.6                       | 18.5 $\pm$ 0.6                             | 8  |

|                           |                 |               |                 |                |    |
|---------------------------|-----------------|---------------|-----------------|----------------|----|
| R5D + D803R               | $-17.8 \pm 0.7$ | $6.5 \pm 0.2$ | $-6.7 \pm 0.4$  | $17.0 \pm 0.4$ | 10 |
| R20D + D803R              | $-28.4 \pm 1.0$ | $5.1 \pm 0.1$ | $-14.0 \pm 0.5$ | $9.8 \pm 0.5$  | 7  |
| R56D + D803R              | $-51.4 \pm 0.5$ | $7.2 \pm 0.1$ | $-17.9 \pm 0.4$ | $5.8 \pm 0.4$  | 17 |
| R4E + E788R               | $-34.3 \pm 1.2$ | $6.8 \pm 0.3$ | $-14.4 \pm 0.9$ | $9.3 \pm 0.9$  | 4  |
| R5E + E788R               | $-21.4 \pm 1.9$ | $8.4 \pm 1.0$ | $-6.8 \pm 1.1$  | $16.9 \pm 1.1$ | 4  |
| R20E + E788R              | $-34.1 \pm 0.7$ | $6.7 \pm 0.4$ | $-13.8 \pm 1.0$ | $9.9 \pm 1.0$  | 4  |
| R56E + E788R              | $-28.7 \pm 1.7$ | $7.1 \pm 0.3$ | $-10.2 \pm 0.8$ | $13.5 \pm 0.8$ | 4  |
| N12E                      | $-31.3 \pm 1.1$ | $7.0 \pm 0.5$ | $-12.6 \pm 1.1$ | $11.1 \pm 1.1$ | 5  |
| N12E + E788R              | $-41.3 \pm 0.7$ | $6.8 \pm 0.5$ | $-16.1 \pm 1.0$ | $7.6 \pm 1.0$  | 8  |
| R4E + R5E                 | $-28.1 \pm 2.3$ | $5.9 \pm 0.2$ | $-12.0 \pm 1.2$ | $11.7 \pm 1.2$ | 5  |
| E698R + E699R             | $-34.8 \pm 1.0$ | $6.6 \pm 0.3$ | $-13.8 \pm 0.8$ | $9.9 \pm 0.8$  | 5  |
| R4E + R5E + E698R + E699R | $-29.5 \pm 1.8$ | $6.4 \pm 0.4$ | $-12.3 \pm 1.2$ | $11.5 \pm 1.2$ | 10 |
| R4D + R5D                 | $-25.3 \pm 0.7$ | $6.5 \pm 0.1$ | $-9.8 \pm 0.3$  | $13.9 \pm 0.3$ | 5  |
| R4D + R5D + R56D          | $-26.1 \pm 0.8$ | $6.5 \pm 0.1$ | $-10.1 \pm 0.5$ | $13.6 \pm 0.5$ | 6  |
| R56A                      | $-35.1 \pm 0.7$ | $6.4 \pm 0.3$ | $-14.1 \pm 0.8$ | $9.7 \pm 0.8$  | 5  |
| D803A                     | $-46.6 \pm 0.6$ | $6.9 \pm 0.4$ | $-17.9 \pm 1.0$ | $5.8 \pm 1.0$  | 11 |
| R56A + D803A              | $-51.4 \pm 0.6$ | $7.6 \pm 0.5$ | $-18.5 \pm 0.9$ | $5.2 \pm 0.9$  | 12 |
| N12A                      | $-45.3 \pm 1.2$ | $5.3 \pm 0.2$ | $-22.7 \pm 0.9$ | $1.1 \pm 0.9$  | 4  |
| E788A                     | $-35.2 \pm 1.2$ | $7.4 \pm 0.6$ | $-13.2 \pm 1.3$ | $10.6 \pm 1.3$ | 6  |
| N12A + E788A              | $-38.6 \pm 1.2$ | $7.6 \pm 0.6$ | $-13.4 \pm 1.1$ | $10.3 \pm 1.1$ | 7  |
| R4A + R5A                 | $-28.4 \pm 0.5$ | $5.0 \pm 0.1$ | $-14.7 \pm 0.3$ | $9.0 \pm 0.3$  | 5  |
| E698A + E699A             | $-47.8 \pm 0.5$ | $6.5 \pm 0.2$ | $-18.8 \pm 0.6$ | $5.0 \pm 0.6$  | 6  |
| R4A + R5A + E698A + E699A | $-43.1 \pm 0.6$ | $6.2 \pm 0.1$ | $-18.0 \pm 0.4$ | $5.7 \pm 0.4$  | 7  |
